# Supplementary material
Source: Springer Nature journal article supplement (https://www.springermedizin.de/resource/supplementary/12911_2007_154_MOESM3_ESM.pdf/9527250)
Supplement: MOESM3 [file 9527250]

# Control Panel of CDMS

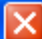

## File input output:

Load input file

Save results to

results.cdms

## Constraints:

Fixed Root Node:

Population:  Prevalence:

Number of tree topologies to search:

Performance search constraints (weighted ACE):

Cost search constraints (cost per patient) (\$):

Perform tree search from  -nodes tree to  -nodes tree

Maximum number of trees in tree browser is  based on

Include/Exclude Clinical Options

Cancel

Help

Run
